# Supplementary material for: Efficacy of ultra-short, response-guided sofosbuvir and daclatasvir therapy for hepatitis C in a single-arm mechanistic pilot study
Source: eLife. 2023 Jan 9;12:e81801. doi: 10.7554/eLife.81801 (PMC9870305; doi:10.7554/eLife.81801)
Supplement: Source data 1. [file elife-81801-data1.xlsx]

## Sheet: Sheet1
ID	Treatment length	SVR12 status	Screening	D0	D1	D2	D7	D10	D14	D28	D42	D56	EOT3	EOT7	EOT10	EOT14	EOT17	EOT21	EOT24	EOT28	EOT56	EOT84		KEY
PA01	8 weeks	SVR12	3394819	1610000	5180	972	81.4	53.1	21.3	TND	TND	TND	TND	TND	TND	TND	TND	TND	TND	TND	TND	TND		Abbott
PA02	4 weeks	non-SVR12	1029976	169058	429	217	78	39	19	<LLOQ TD			<LLOQ TD	14	<LLOQ TD	TND	<LLOQ TD	TND	<LLOQ TD	TND	TND	3390		COBAS
PA03	4 weeks	SVR12	554829	809026	327	101	<LLOQ TD	<LLOQ TD	TND	TND			TND	TND	TND	TND	TND	TND	TND	TND	TND	TND
PA04	8 weeks	SVR12	4715485	11142965	2973	958	130	85.9	23.9	<LLOQ TD	TND	TND	TND	TND	TND	<LLOQ TD	TND	TND	TND	TND	TND	TND
PA05	8 weeks	SVR12	838037	543608	12290	2696	35	<LLOQ TD	<LLOQ TD	TND	TND	TND	TND	TND	TND	TND	TND	TND	TND	TND	TND	TND
PA06	4 weeks	SVR12	3540258	4275797	709	157	94	43	13	<LLOQ TD			TND	TND	TND	TND	TND	TND	TND	TND	TND	TND
PA07	8 weeks	SVR12	6243182	4267346	2668	704	84	withdrew	withdrew	withdrew	withdrew	withdrew	withdrew	withdrew	withdrew	withdrew	withdrew	withdrew	withdrew	withdrew	withdrew	withdrew
PA08	8 weeks	SVR12	2915879	1044562	2726	659	100	91	53	53	<LLOQ TD	TND	TND	<LLOQ TD	TND	TND	TND	TND	TND	TND	TND	TND
PA09	4 weeks	non-SVR12	52988	318321	195	69	<LLOQ TD	<LLOQ TD	TND	TND				<LLOQ TD		TND	TND	TND	TND	TND	1376	377978
PA10	4 weeks	SVR12	3451894	319170	263	19	<LLOQ TD	13	<LLOQ TD	TND			TND	TND	TND	TND	TND	TND	TND	TND	TND	TND
PA11	4 weeks	SVR12	30121	189484	169	51	13	TND	<LLOQ TD	<LLOQ TD			TND	TND		TND	TND	<LLOQ TD	TND	TND	TND	TND
PA12	4 weeks	non-SVR12	3223523	3432008	1158	104		<LLOQ TD	TND	<LLOQ TD			TND	TND	TND	TND	TND	TND	TND	TND	59675
PA13	4 weeks	non-SVR12	3381995	1806423	231	216	32	<LLOQ TD	<LLOQ TD	TND			TND	<LLOQ TD	TND	TND	<LLOQ TD	856	24386	453252
PA14	4 weeks	SVR12	911979	1897757	223	55	<LLOQ TD	14	<LLOQ TD	TND			TND	TND	<LLOQ TD	<LLOQ TD	TND	TND	TND	TND	TND	TND
PA15	4 weeks	non-SVR12	25256	27233	235	60	19	<LLOQ TD	15	15			<LLOQ TD	TND	<LLOQ TD	TND	TND	<LLOQ TD	TND	<LLOQ TD	<LLOQ TD	67206
PA16	4 weeks	SVR12	103342	118113	66	18	<LLOQ TD	<LLOQ TD	TND	TND			47		TND	TND	TND			TND	TND	TND
PA17	4 weeks	SVR12	274624	618	TND	TND	TND	TND	TND	TND			TND		TND	TND	TND		TND	TND	TND	TND
PA18	4 weeks	non-SVR12	3491099	2327300	893	179	28	TND	TND	TND			TND	TND	TND	TND	TND	TND	<LLOQ TD	<LLOQ TD	17400000
PA19	4 weeks	non-SVR12	911964	3796634	237	156	37	35	TND	TND			TND	TND	TND	TND	TND	TND	TND	TND	1320000
PA20	4 weeks	SVR12	332037	709549	1398	152	66	<LLOQ TD	30	21			<LLOQ TD	12	<LLOQ TD	<LLOQ TD	TND		<LLOQ TD	<LLOQ TD	TND	TND
PA21	4 weeks	SVR12	4781885	4157876	4398	294	99	61.9	26.2	<LLOQ TD			TND	TND	<LLOQ TD	TND	TND	<LLOQ TD	TND	TND	TND	TND
PA22	4 weeks	non-SVR12	6732180	5346781	1038	375	82	<LLOQ TD	20	<LLOQ TD			<LLOQ TD		TND	TND	<LLOQ TD	2558	321427	13457438
PA23	4 weeks	SVR12	2737074	2605618	963	215	69	33	23	TND				TND		TND		TND			TND	TND
PA24	8 weeks	SVR12	771089	3640662	2891	521	360	140	117	TND	TND	TND	TND	TND	TND	TND	TND	TND	TND	TND	TND	TND
PA25	4 weeks	SVR12	124864	188153	415	69	<LLOQ TD	TND		TND				TND	TND	TND	TND	TND	TND	TND	TND	TND
PA26	4 weeks	SVR12	2860000	916000	835	99	<LLOQ TD	15.6	TND	TND			TND	TND	TND			TND	TND	TND	TND	TND
PA27	4 weeks	non-SVR12	59675	327000	603	209	38.6	23.8	<LLOQ TD	TND			TND	TND	TND	TND	TND	TND	27	41100
PA28	4 weeks	SVR12	933417	699641	601	177	59	23	40	<LLOQ TD			<LLOQ TD	<LLOQ TD	TND	<LLOQ TD	TND	TND	<LLOQ TD	TND	TND	TND
PA29	8 weeks	SVR12	6155817	11125981	2883	1145	387	313	257	114	28	<LLOQ TD	<LLOQ TD	22	<LLOQ TD	<LLOQ TD	<LLOQ TD	<LLOQ TD	<LLOQ TD	<LLOQ TD	TND	TND
PA30	8 weeks	SVR12	5271842	9290839	964864	302155	845		118	12	TND	TND	TND	TND		TND	TND	TND	TND	TND	TND	TND
PA31	8 weeks	SVR12	8022155	9034611	5058	2394	302	135	61	TND	TND	TND	TND	TND	TND	TND	<LLOQ TD	TND	TND	TND	TND	TND
PA32	4 weeks	SVR12	7205	10248	<LLOQ TD	TND	<LLOQ TD	TND	TND	TND			TND	TND	TND	TND	TND	TND	TND	TND	TND	TND
PA33	4 weeks	SVR12	1240000	314000	85.4	26.8	16.7	TND	TND	TND			TND	TND	TND	TND			TND	TND	TND	TND
PA34	8 weeks	SVR12	1981598	2125100	965	651	141	51.9	54	TND	<LLOQ TD	TND	TND	TND	TND	TND	TND	TND	TND	TND	TND	TND
PA35	8 weeks	SVR12	4358513	4982889	3007	690	80	16	24	<LLOQ TD	TND	TND	TND	TND	TND	TND	TND	TND	TND	TND	TND	TND
PA36	4 weeks	SVR12	704578	1308132	319	89	<LLOQ TD	<LLOQ TD	<LLOQ TD	<LLOQ TD			<LLOQ TD		TND	TND	TND		TND	TND	TND	TND
PA37	8 weeks	SVR12	978558	5818412	2070	1038	719	647	240	31	16	<LLOQ TD	<LLOQ TD	<LLOQ TD	<LLOQ TD	<LLOQ TD	<LLOQ TD	<LLOQ TD	TND	TND	TND	TND
PA38	4 weeks	SVR12	1037243	1112800	4099	265	32	17	<LLOQ TD	TND			TND	TND	TND		TND	TND	TND	TND	TND	TND
PA39	4 weeks	non-SVR12	470252	124340	176	79	29	<LLOQ TD	<LLOQ TD	TND			TND	TND	TND	TND	TND	TND	<LLOQ TD	237
PA40	8 weeks	SVR12	2220000	2010000	2880	2430	446	249	107			TND										TND
PA41	4 weeks	non-SVR12	3920000	5260000	1320	364	72.5	<LLOQ TD	<LLOQ TD	TND			TND	TND	TND	28.6	TND	TND	<LLOQ TD	106
PA42	8 weeks	SVR12	4427912	7200000	2710	832	255	117	48.1	TND	TND	TND	TND	TND	TND	TND	TND	TND	TND	TND	TND	TND
PA43	4 weeks	non-SVR12	1897757	2139258	839	268	16	TND	<LLOQ TD	TND			TND	TND	<LLOQ TD	TND	<LLOQ TD	129	925	149127
PA44	4 weeks	SVR12	3442622	1800000	683	320	54.7	39.2	19.3	20.2			16.9	TND	TND	TND	TND	TND	TND	TND	TND	<LLOQ TD
PA45	8 weeks	SVR12	4709773	10296193	14475	1098	131	66	<LLOQ TD	TND	TND	TND	TND	TND	TND	TND	TND	TND	TND	TND	TND	TND
PA46	4 weeks	non-SVR12	4305796	5450000	2450	459	191	60.5	16.2	18.7			18.1	<LLOQ TD	TND	TND	TND	TND	<LLOQ TD	TND	1740000
PA47	4 weeks	SVR12	1625239	1659960	725	270	20	20	<LLOQ TD	TND			<LLOQ TD	<LLOQ TD	TND	TND	TND	TND	<LLOQ TD	TND	TND	TND
PA48	8 weeks	SVR12	8500000	11200000	1930	525	53.1	15.9	<LLOQ TD	TND	TND	TND						TND		TND		TND
PA49	8 weeks	SVR12	765717	1967792	2096	617	130	59	54	TND	TND	TND	TND	TND	TND	TND	TND	TND	TND	TND	TND	TND
PA50	8 weeks	SVR12	1793740	3680397	2706	1114	172	74	17	TND	TND	TND	TND	TND	TND	TND	TND	TND	<LLOQ TD	TND	TND	TND
PA51	4 weeks	SVR12	3286108	2263595	685	206	45	12	<LLOQ TD	TND			TND		TND	TND	TND	TND	TND	TND	TND	TND
PA52	4 weeks	SVR12	1066830	1695423	934	492	53	31	15	TND			TND	TND	<LLOQ TD	TND	TND	TND	TND	<LLOQ TD	TND	TND
